# Supplementary material
Source: Research Square preprint supplement (doi:10.21203/rs.3.rs-9489127/v1)
Supplement: Supplementary file 1 [file 0f32fec68fb30a32e3c4b8b4.docx]

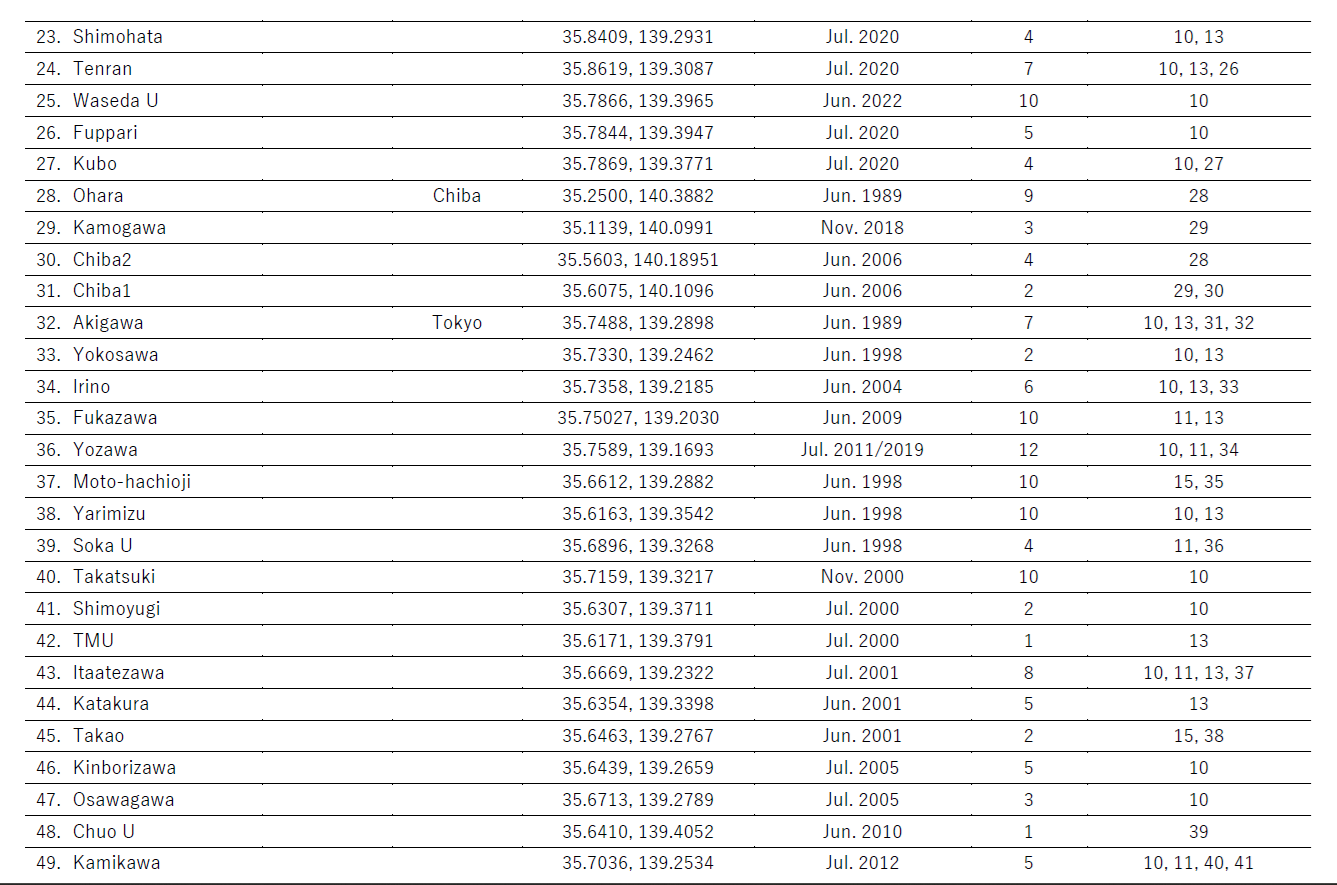

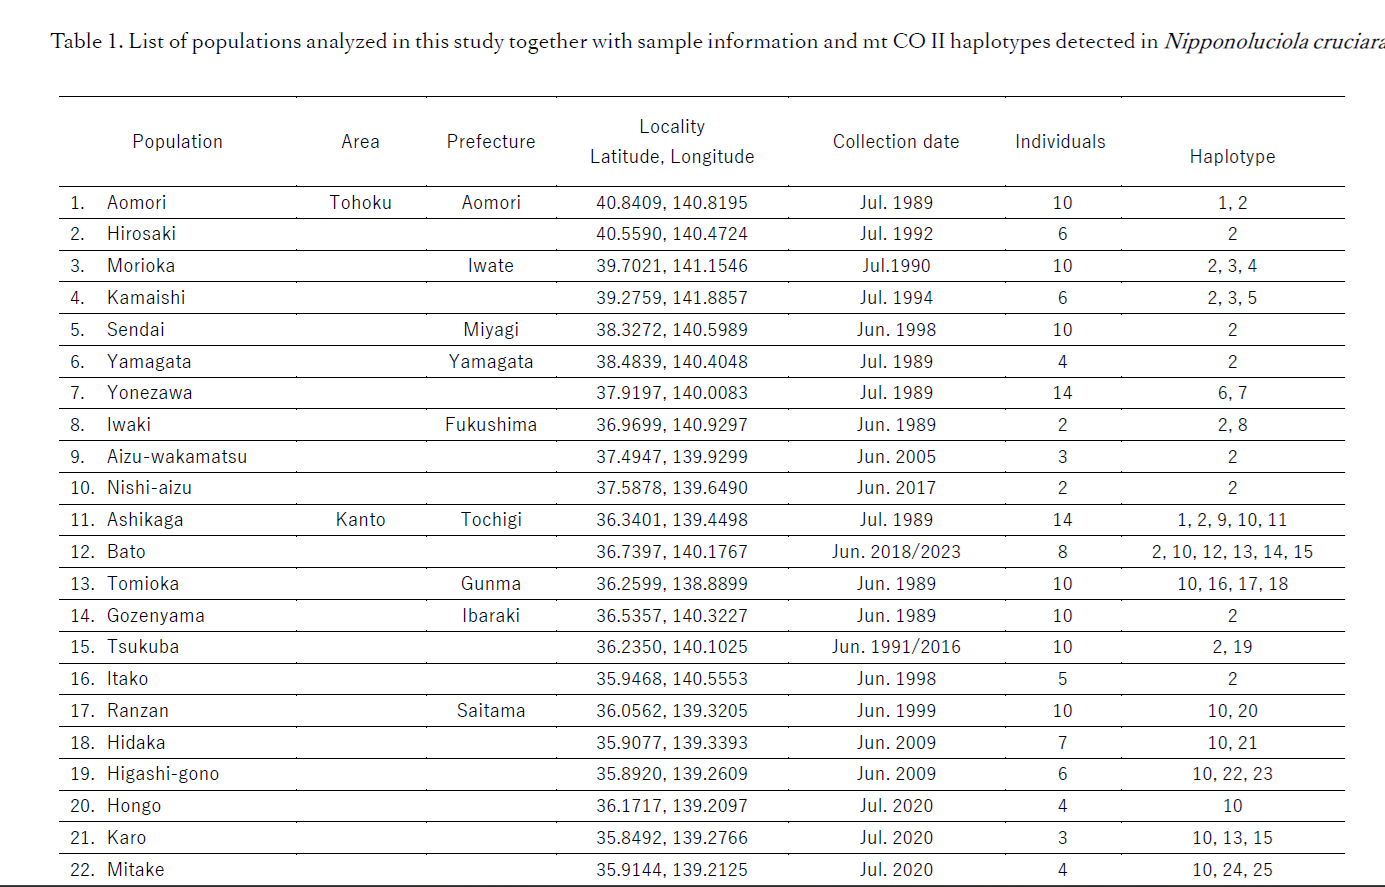


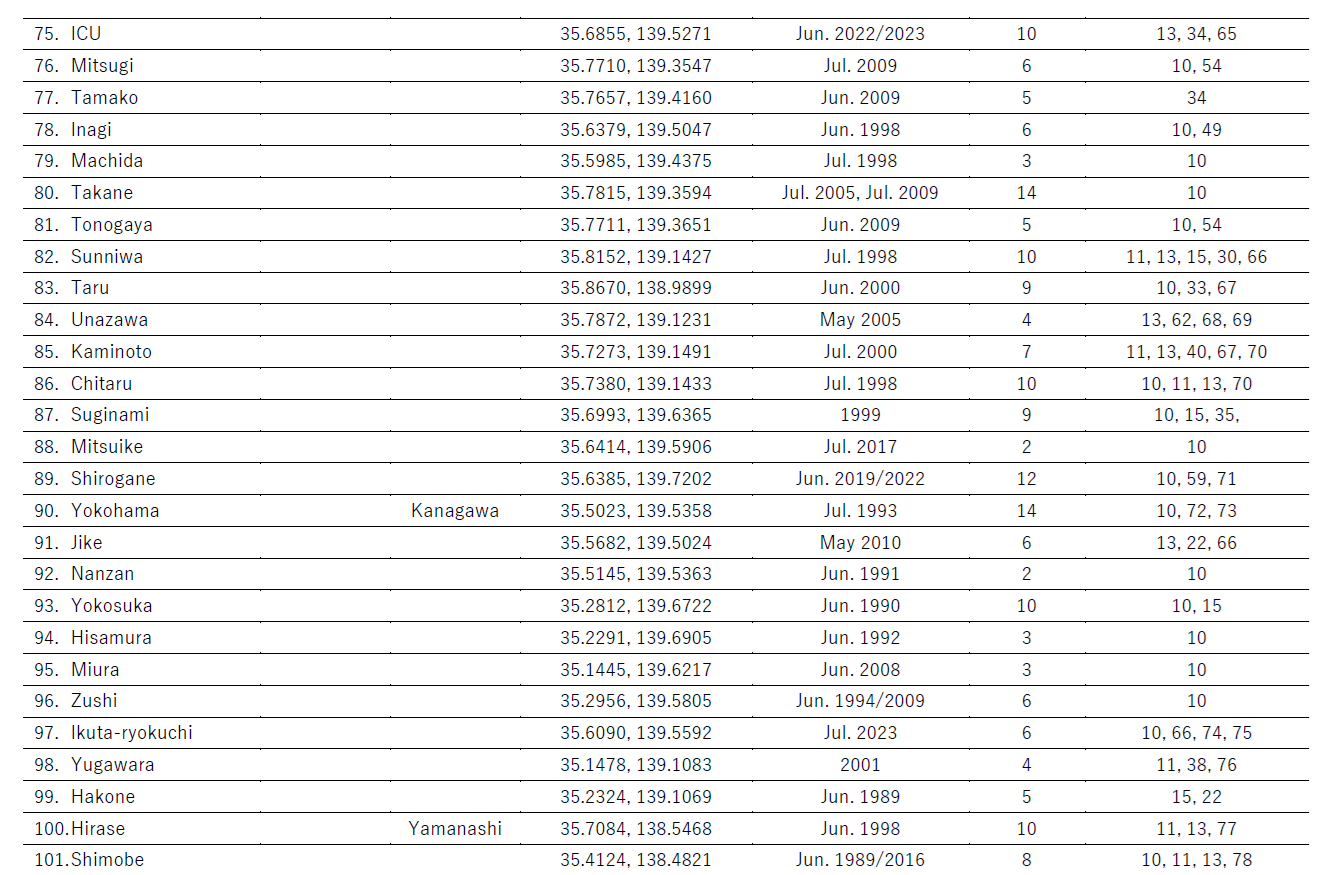

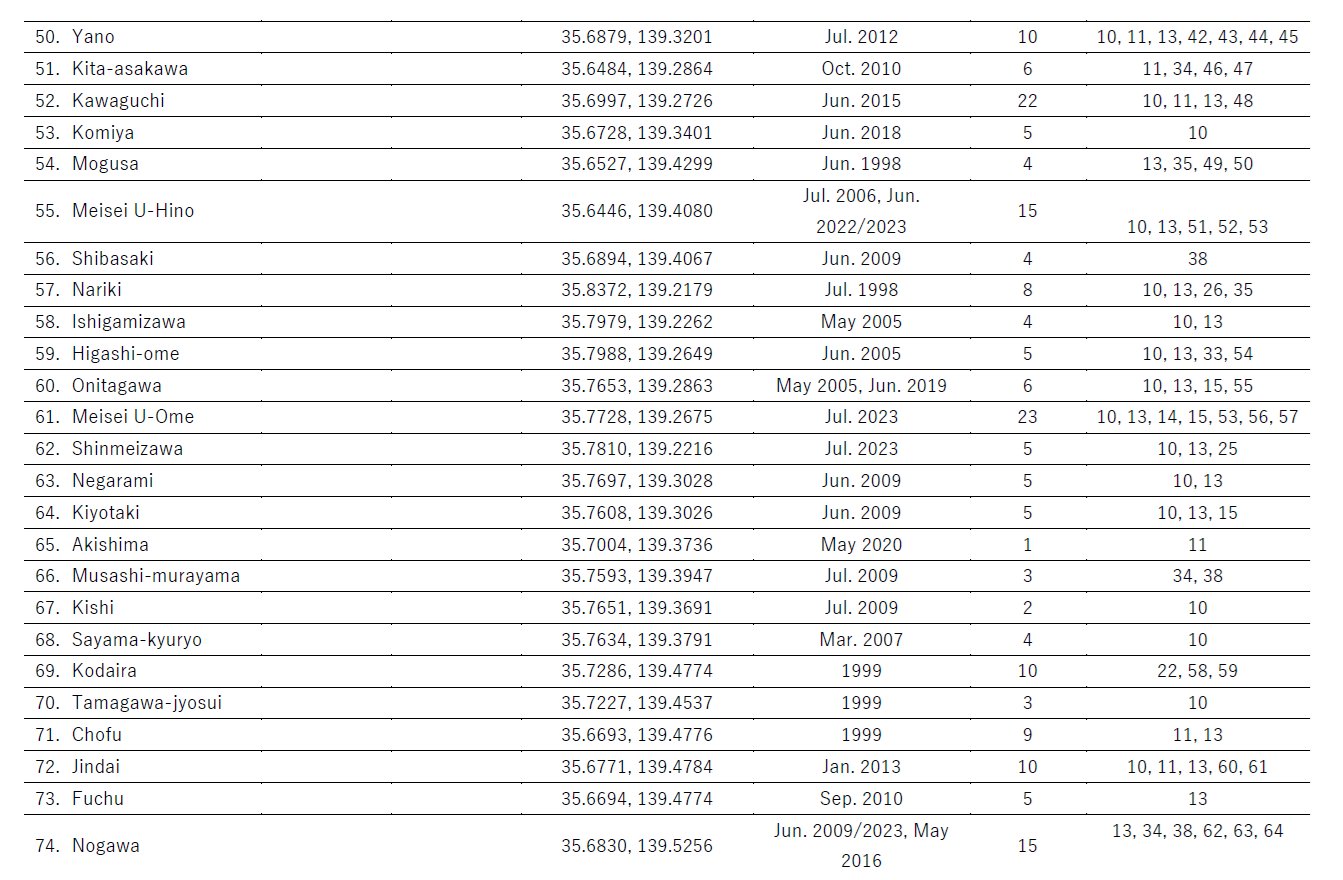


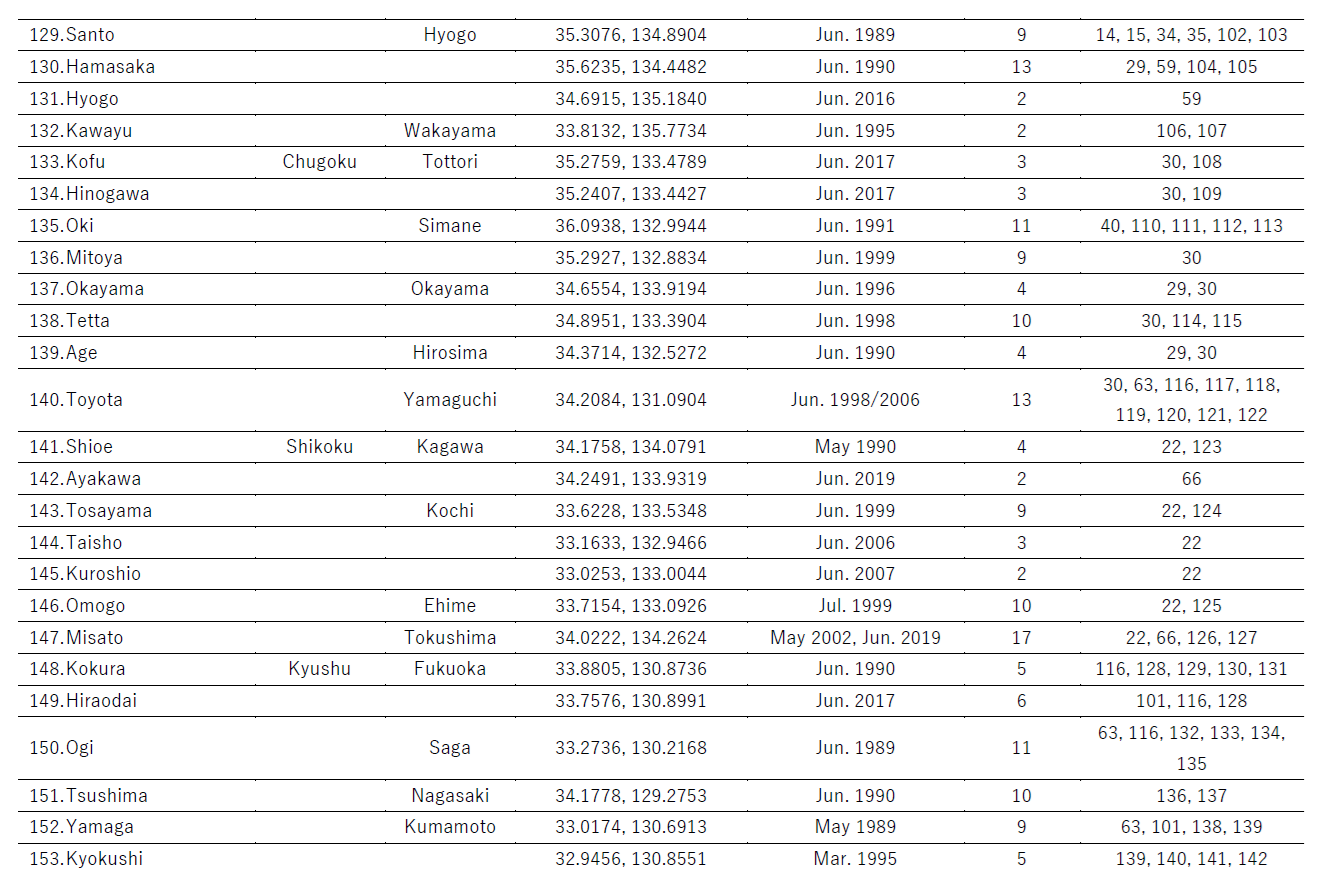

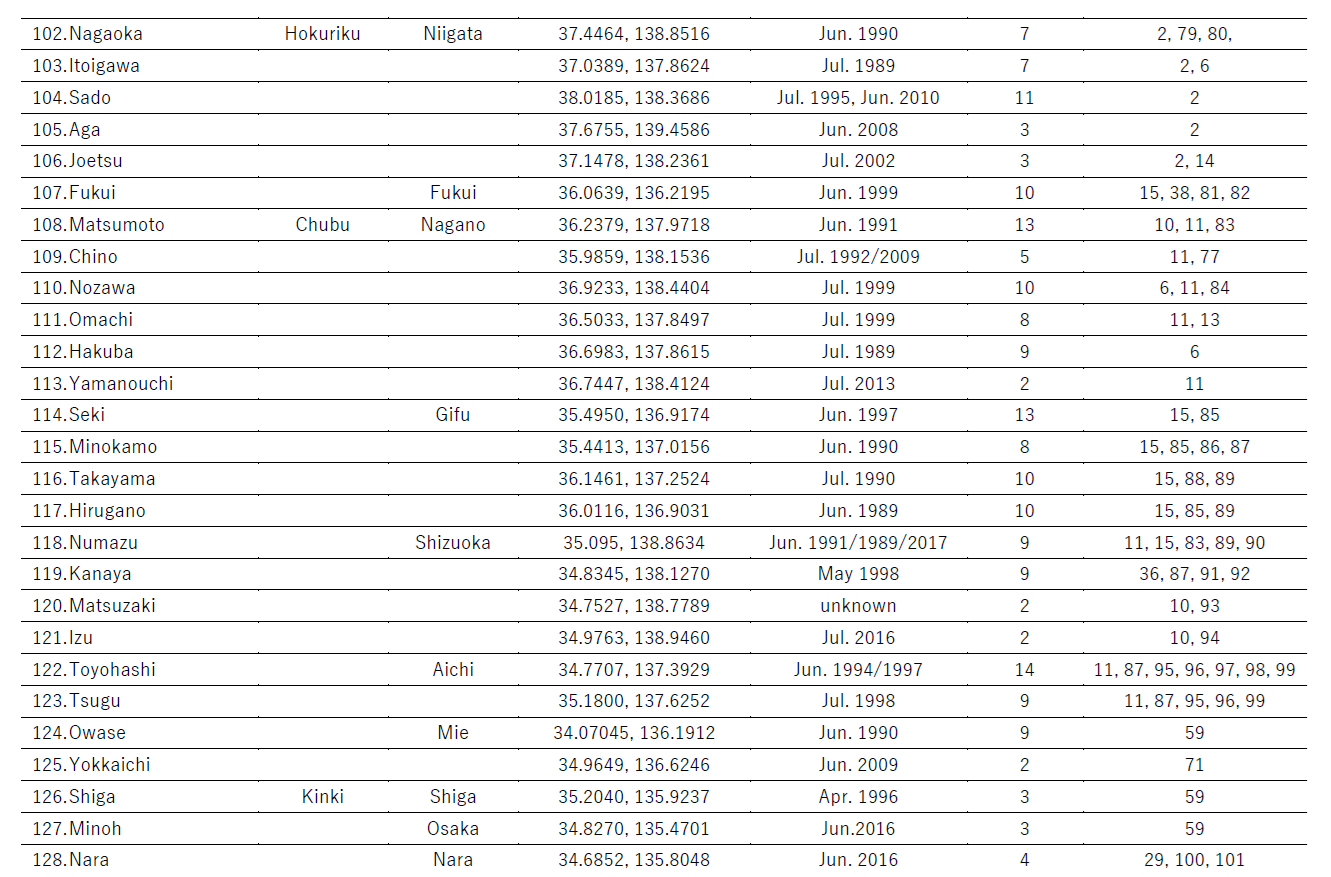


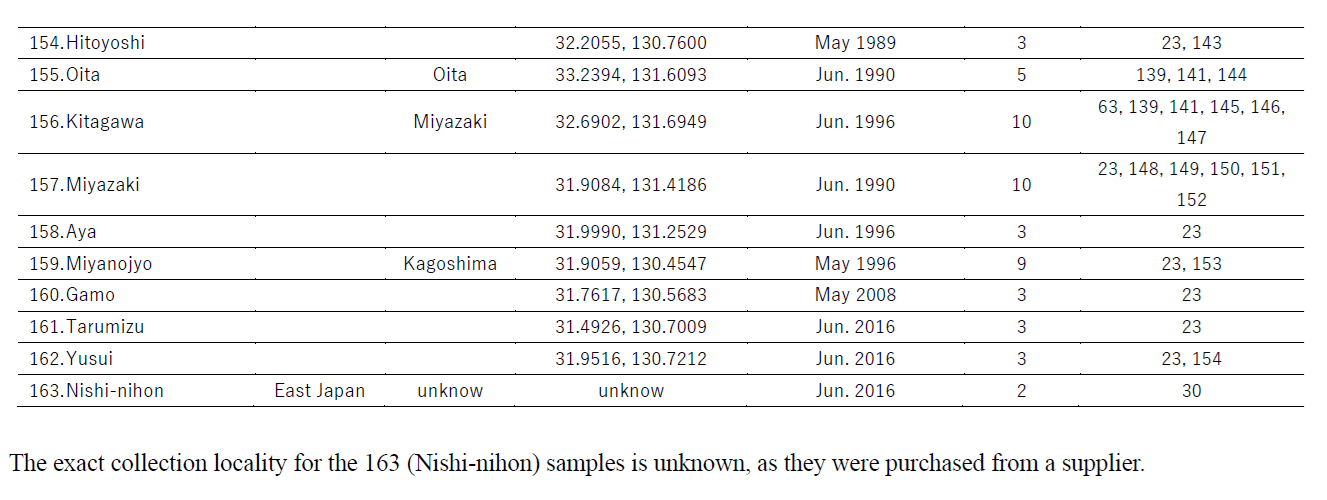


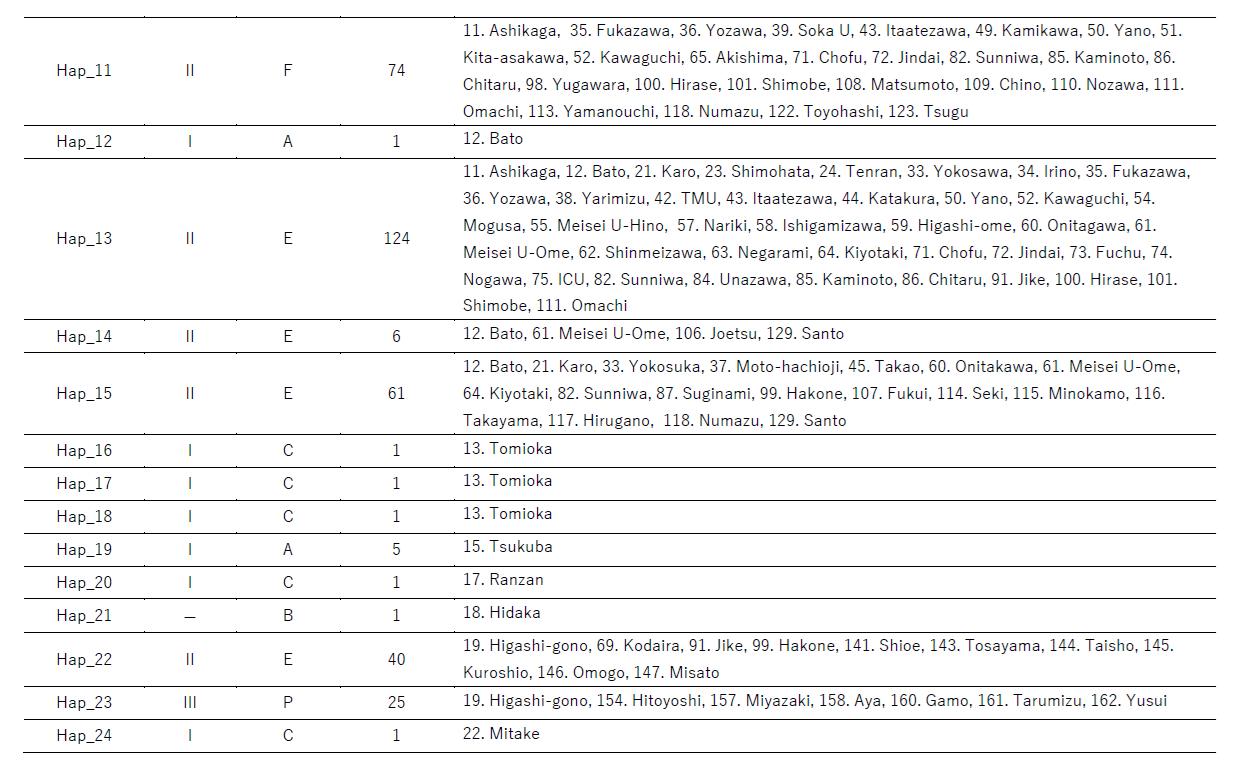

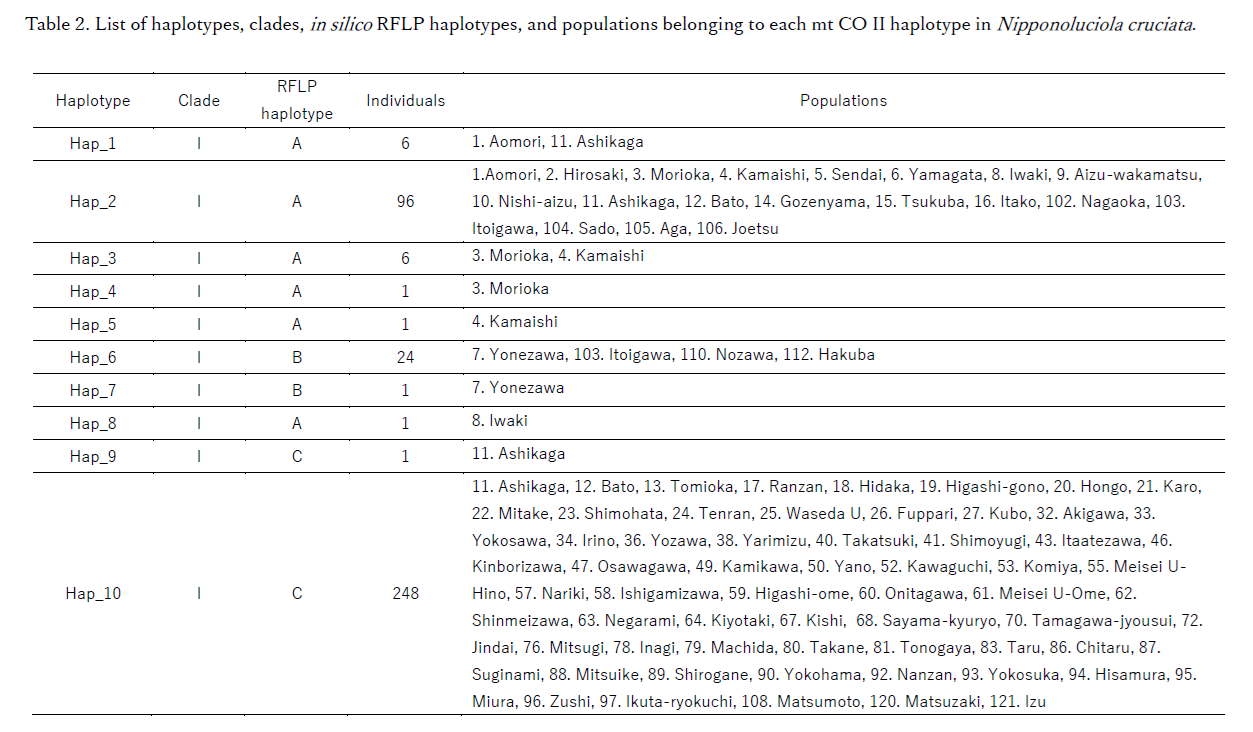


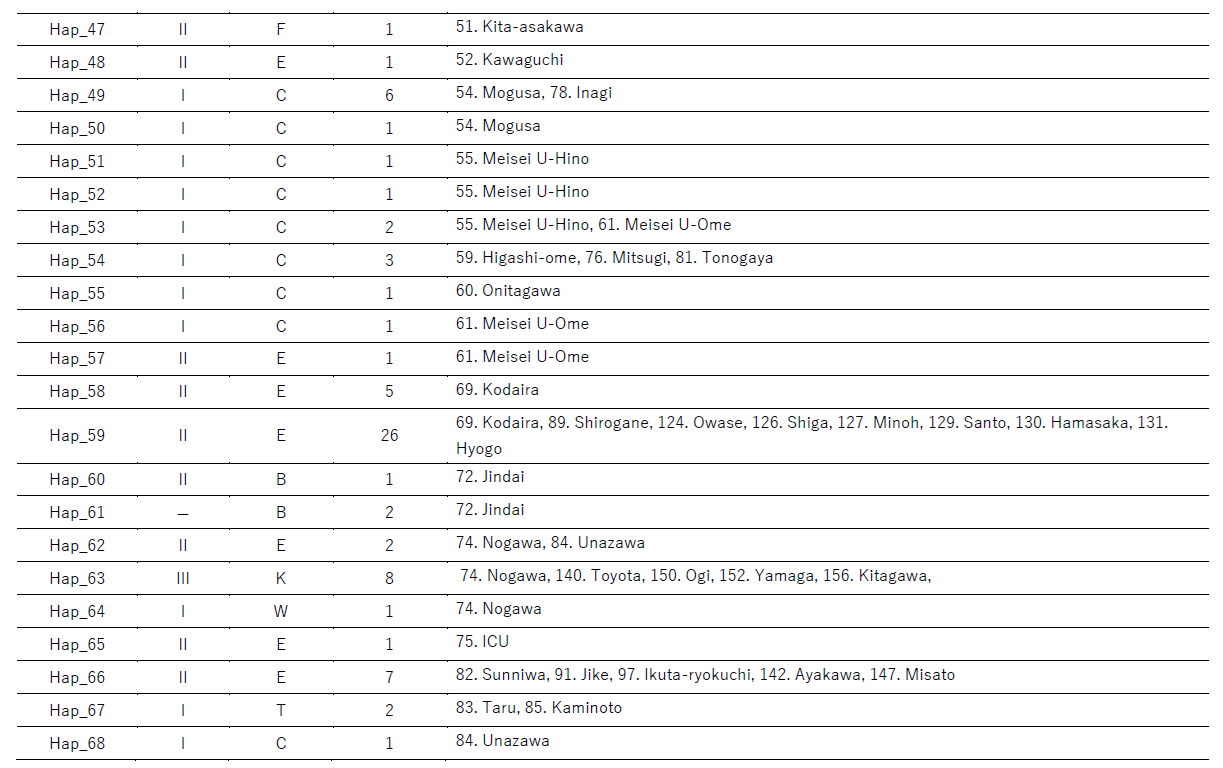

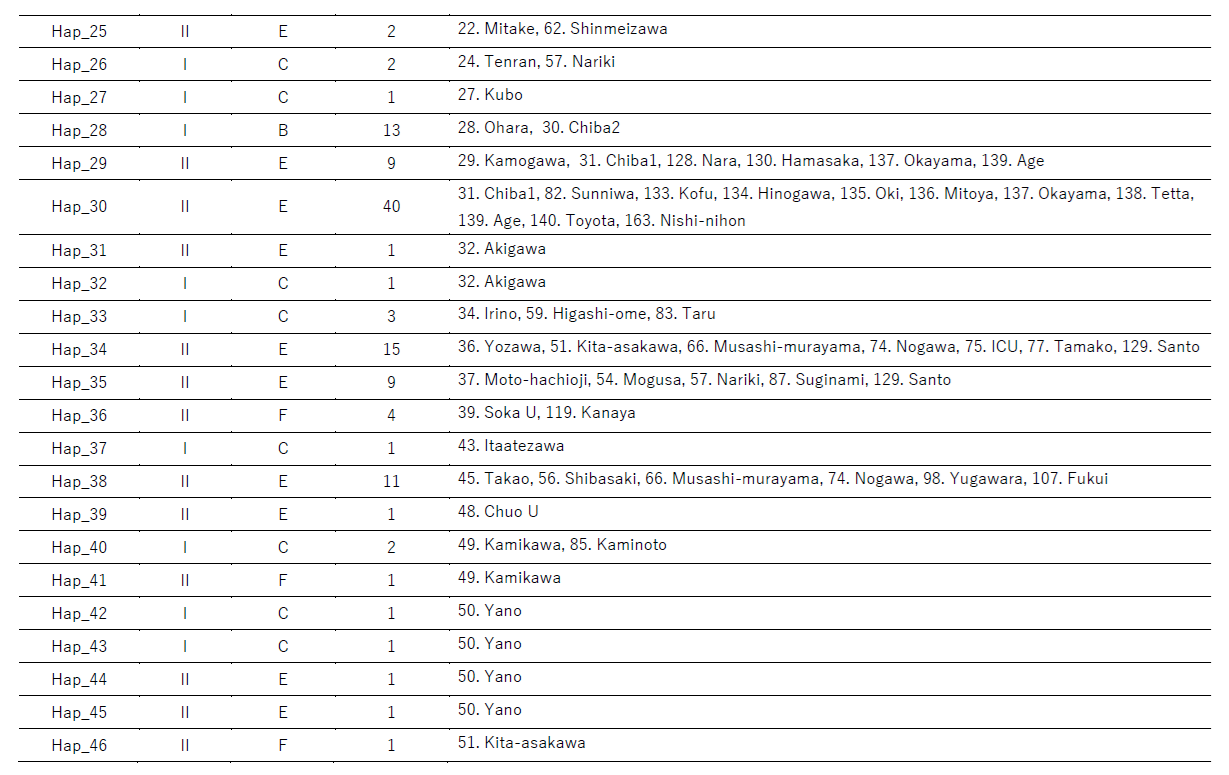


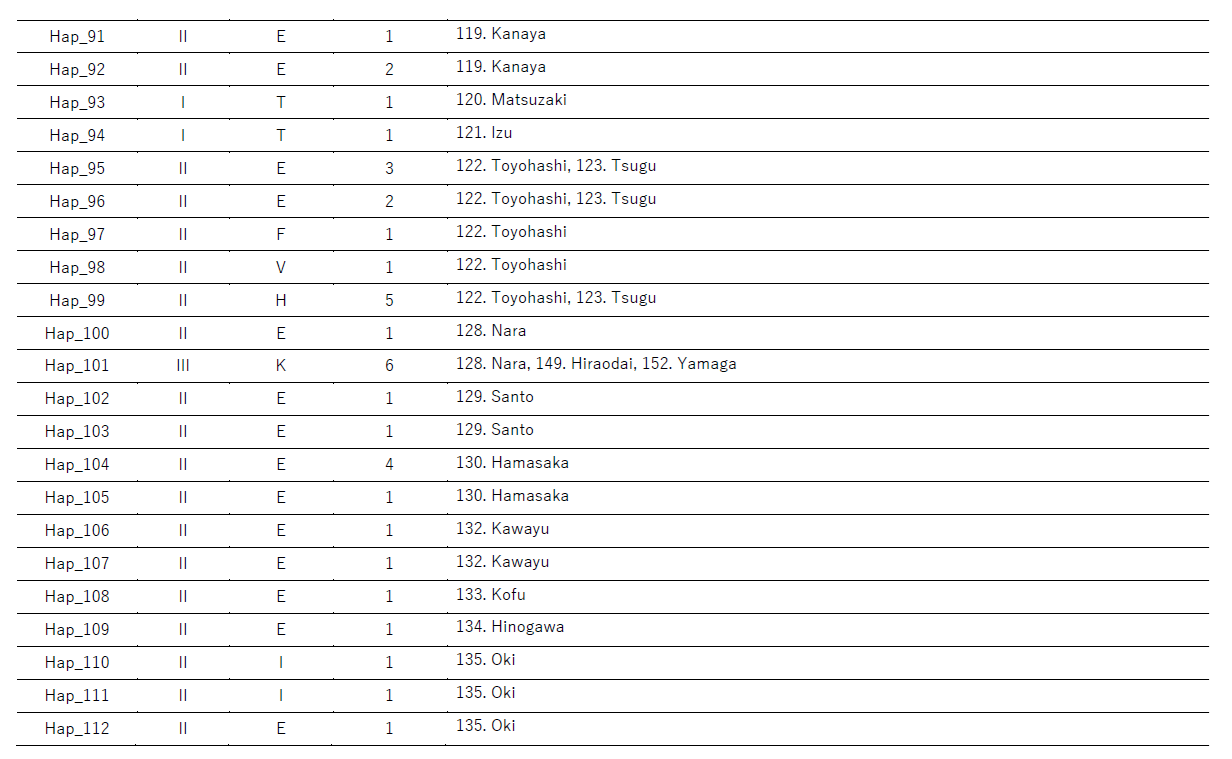

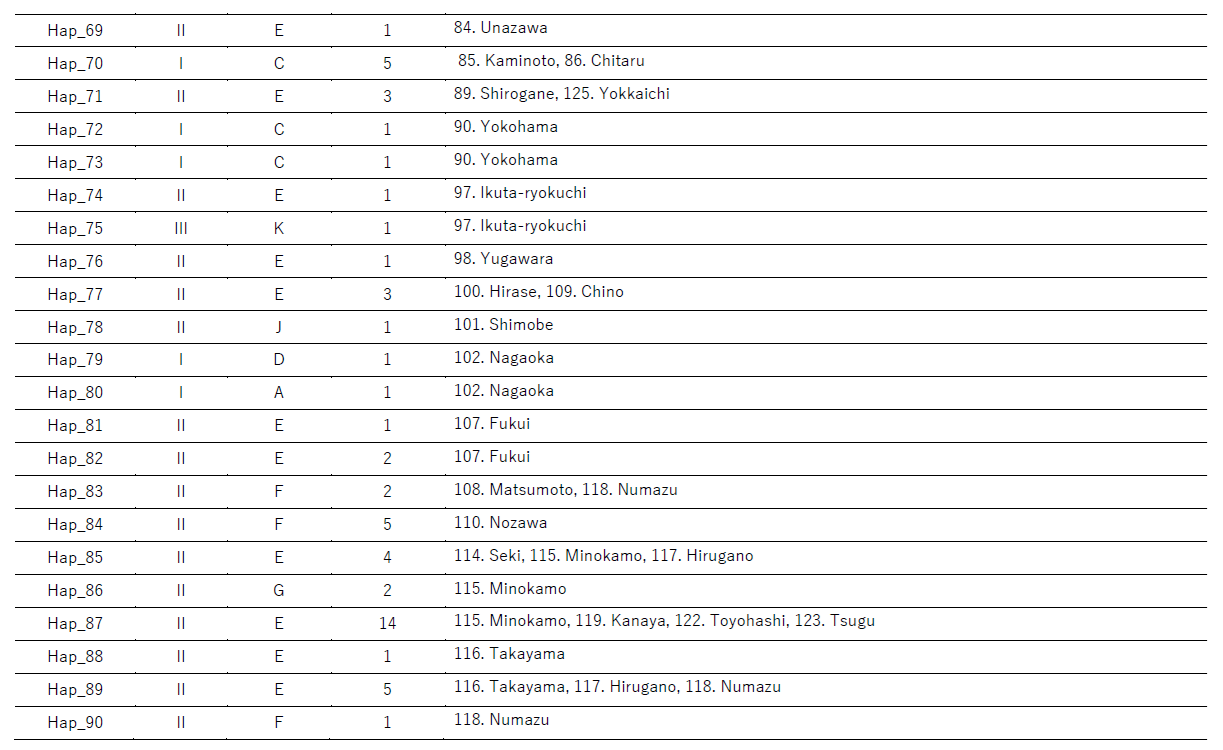


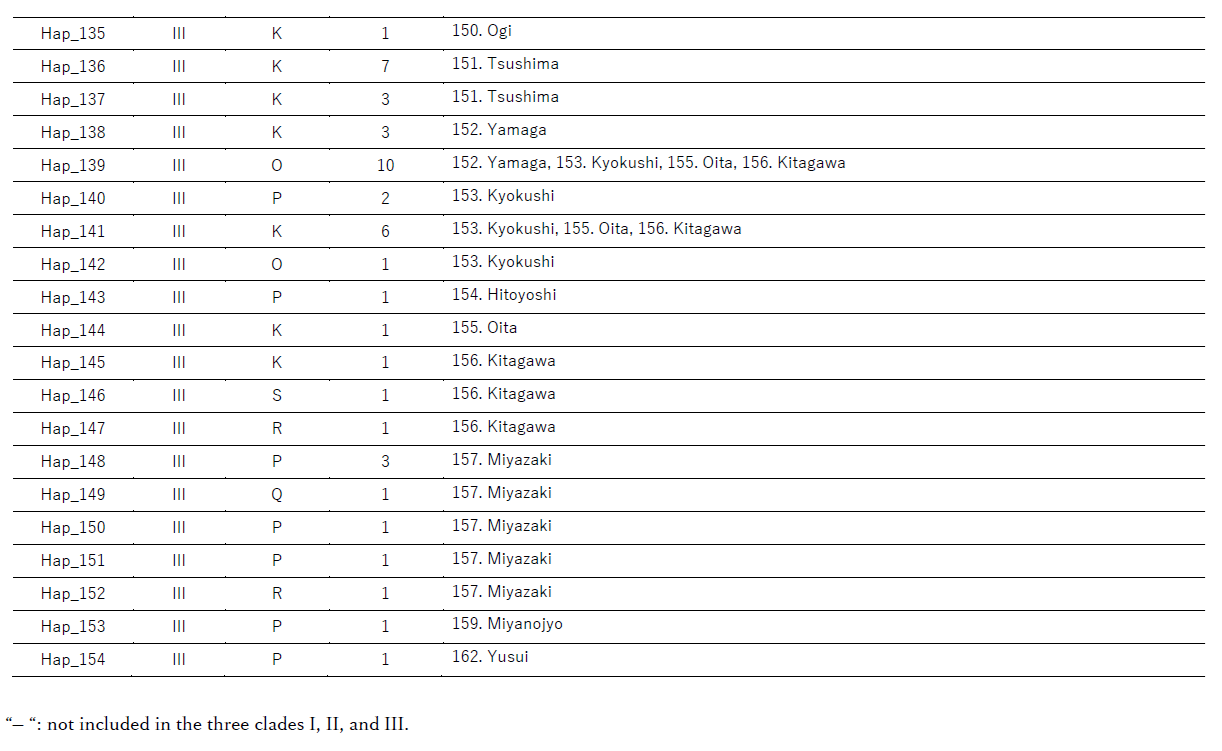

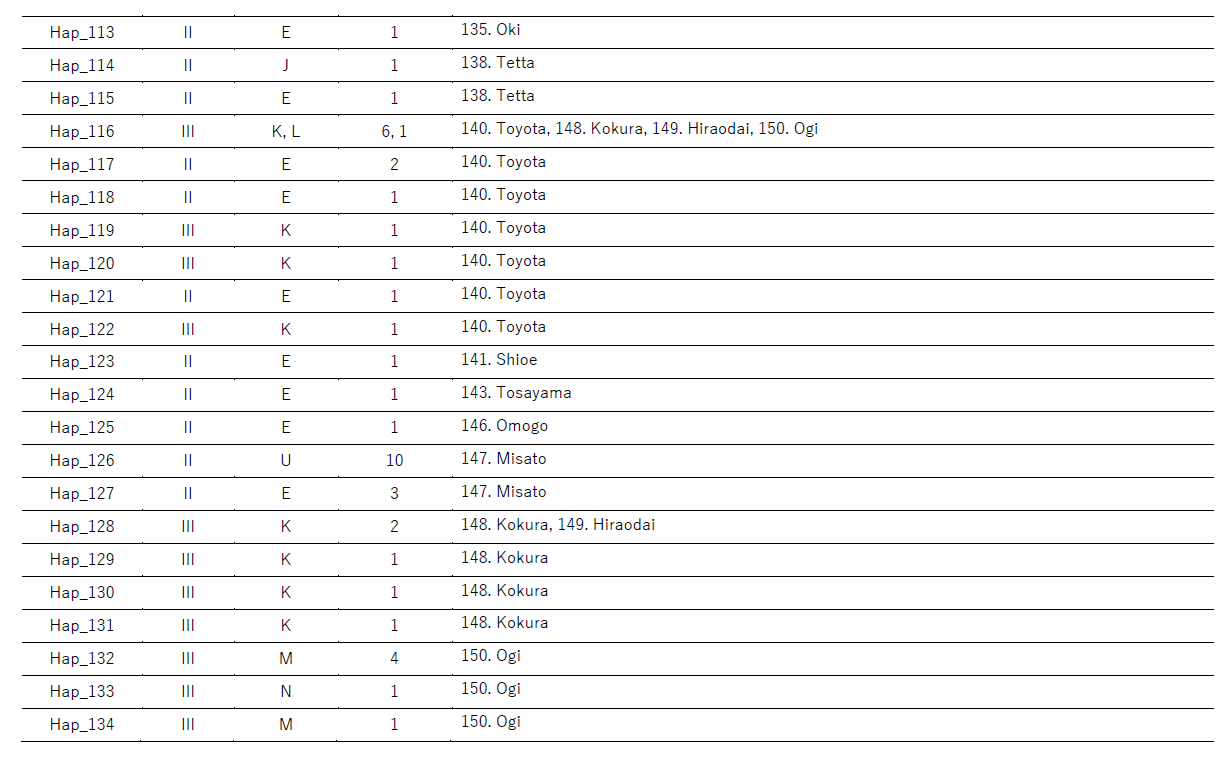


Table 3. Genetic differentiation matrix (Kst) among four population groups, East Honshu, Tokyo, West Honshu-Shikoku, and Kyushu in *Nipponoluciola cruciata*.

| Kst | East Honshu | Tokyo | West Honshu-Shikoku |
| --- | --- | --- | --- |
| Tokyo | 0.1247 | – |  |
| West Honshu-Shikoku | 0.4366 | 0.1555 | – |
| Kyushu | 0.4725 | 0.3863 | 0.4866 |
|  |  |  |  |

All Kst values were significant (p < 0.001) based on permutation tests with 1,000 replicates.

Table 4. Gene flow matrix (Nm) among four population groups, East Honshu, Tokyo, West Honshu-Shikoku, and Kyushu in *Nipponoluciola cruciata*.

| Nm | East Honshu | Tokyo | West Honshu-Shikoku |
| --- | --- | --- | --- |
| Tokyo | 3.47 | – |  |
| West Honshu-Shikoku | 0.64 | 2.69 | – |
| Kyushu | 0.56 | 0.79 | 0.52 |
|  |  |  |  |
