# Supplementary material
Source: Research Square preprint supplement (doi:10.21203/rs.3.rs-9489127/v1)
Supplement: Supplementary file 2 [file 2b57d056287c963da4da3c2a.xlsx]

## Sheet: S1
Supplementary Table S1. Restriction enzyme recognition sites of mitochondrial COII used for in silico RFLP haplotyping
	Restriction endonuclease
RFLP Haplotype	Ase I	Rsa I	Mva I	Hae III	Hinf I	Hpa II
A	a(181/228/258)	a(154/294/469)	a(247/568)	a(343)	b(396)	a(–)
B	a(181/228/258) a2(181/193/228/258)	a(154/294/469)	a(247/568)	a(343)	a(199/396)	a(–)
C	a(181/228/258)	a(154/294/469)	b(132/568)	a(343)	a(199/396) a2(8/199/396)	b(246)
D	d(228/258)	a(154/294/469)	a(247/568)	a(343)	b(396)	a(–)
E	a(181/228/258) a3(39/181/228/258)	b(154/294)	a(247/568)	a(343)	a(199/396)	c(461)
F	b(181/228/258/310) b2(39/181/228/258/310)	b(154/294)	a(247/568)	a(343)	a(199/396)	c(461)
G	a(181/228/258)	b(154/294)	a(247/568)	a(343)	c(199/396/518)	c(461)
H	a(181/228/258)	b(154/294)	a(247/568)	a(343)	b(396)	c(461)
I	a(181/228/258)	b(154/294)	a(247/568)	a(343)	d(199/396/655)	c(461)
J	a3(39/181/228/258)	b(154/294)	a(247/568)	a(343)	a(199/396)	a(–)
K	d(228/258)	a(154/294/469)	a(247/568)	b(–)	b(396)	a(–)
L	d(228/258)	a(154/294/469)	a(247/568)	b(–)	b(396)	c(461)
M	a(181/228/258)	a(154/294/469)	a(247/568)	b(–)	b(396)	a(–)
N	d(228/258)	a(154/294/469)	a(247/568)	a(343)	b(396)	a(–)
O	d(228/258)	a(154/294/469)	c(247)	b(–)	b(396)	e(568)
P	c(228)	a(154/294/469)	a(247/568)	a(343)	b(396)	a(–)
Q	c(228)	a(154/294/469)	c(247)	a(343)	b(396)	e(568)
R	c(228)	c(294/469)	a(247/568)	a(343)	b(396)	a(–)
S	d(228/258)	a(154/294/469)	a(247/568)	b(–)	b(396)	d(440)
T	a(181/228/258)	a(154/294/469)	d(132/247/568)	a(343)	a(199/396)	a(–)
U	a(181/228/258)	b(154/294)	d(132/247/568)	a(343)	a(199/396)	c(461)
Ｖ	a(181/228/258)	d(154)	a(247/568)	a(343)	a(199/396)	c(461)
W	a(181/228/258)	a(154/294/469)	e(568)	a(343)	b(396)	a(–)
Restriction endonucleases and their recognition sites used to infer in silico RFLP haplotypes from mitochondrial COII sequences of Nipponoluciola cruciata. The combination of restriction patterns generated by six enzymes (Ase I, Hae III, Hinf I, Hpa II, Mva I, and Rsa I) was used to assign RFLP haplotypes following the classification scheme of Suzuki et al. (2002). Restriction pattern is shown by…
