# Supplementary material
Source: Research Square preprint supplement (doi:10.21203/rs.3.rs-9489127/v1)
Supplement: Supplementary file 3 [file 79aa3787adebc0d891d52c1e.xlsx]

## Sheet: S4
Supplementary Table S４. List of in silico RFLP haplotypes and their frequencies with some population structual parameters in each population
Population	Individual	in silico RFLP haplotype (Freq.)	Haplotype	Haplotype diversity (Hd)	Nucleotide diversity (Pi)	Clade	Population group
1. Aomori	10	A	1, 2	0.46667	0.00068	I	East Honshu
2. Hirosaki	6	A	2	0	0	I	East Honshu
3. Morioka	10	A	2, 3, 4	0.51111	0.00098	I	East Honshu
4. Kamaishi	6	A	2, 3, 5	0.6	0.00098	I	East Honshu
5. Sendai	10	A	2	0	0	I	East Honshu
6. Yamagata	4	A	2	0	0	I	East Honshu
7. Yonezawa	14	B	6, 7	0.14286	0.00021	I	East Honshu
8. Iwaki	2	A	2, 8	1	0.00147	I	East Honshu
9. Aizu-wakamatsu	3	A	2	0	0	I	East Honshu
10. Nishi-aizu	2	A	2	0	0	I	East Honshu
11. Ashikaga	14	A (0.71), C (0.21), F (0.08)	1, 2, 9, 10, 11	0.72527	0.00567	I, II	East Honshu
12. Bato	8	A (0.25), C (0.25), E (0.50)	2, 10, 12, 13, 14, 15	0.92857	0.01115	I, II	East Honshu
13. Tomioka	10	C	10, 16, 17, 18	0.53333	0.0014	I	East Honshu
14. Gozenyama	10	A	2	0	0	I	East Honshu
15. Tsukuba	10	A	2, 19	0.55556	0.00081	I	East Honshu
16. Itako	5	A	2	0	0	I	East Honshu
17. Ranzan	10	C	10, 20	0.2	0.00029	I	East Honshu
18. Hidaka	7	B (0.14), C (0.86)	10, 21	0.28571	0.0132	I, –	East Honshu
19. Higashi-gono	6	C (0.17), E (0.67), P (0.16)	10, 22, 23	0.6	0.0132	I, II, III	East Honshu
20. Hongo	4	C	10	0	0	I	East Honshu
21. Karo	3	C (0.33), E (0.67)	10, 13, 15	1	0.01075	I, II	East Honshu
22. Mitake	4	C (0.75), E (0.25)	10, 24, 25	0.83333	0.00806	I, II	East Honshu
23. Shimohata	4	C (0.75), E (0.25)	10, 13	0.5	0.0066	I, II	East Honshu
24. Tenran	7	C (0.86), E (0.14)	10, 13, 26	0.52381	0.00461	I, II	East Honshu
25. Waseda U	10	C	10	0	0	I	East Honshu
26. Fuppari	5	C	10	0	0	I	East Honshu
27. Kubo	4	C	10, 27	0.5	0.00073	I	East Honshu
28. Ohara	9	B	28	0	0	I	East Honshu
29. Kamogawa	3	J	29	0	0	II	West Honshu-Shikoku
30. Chiba2	4	B	28	0	0	I	East Honshu
31. Chiba1	2	E (0.50), J (0.50)	29, 30	1	0.00293	II	West Honshu-Shikoku
32. Akigawa	7	C (0.57), E (0.29), J (0.14)	10, 13, 31, 32	0.80952	0.00922	I, II	Tokyo
33. Yokosawa	2	C (0.50), E (0.50)	10, 13	1	0.0132	I, II	Tokyo
34. Irino	6	C (0.50), E (0.50)	10, 13, 33	0.73333	0.00782	I, II	Tokyo
35. Fukazawa	10	E (0.90), F (0.10)	11, 13	0.2	0.00088	II	Tokyo
36. Yozawa	12	C (0.58), E (0.33), F (0.09)	10, 11, 13, 34	0.63636	0.00784	I, II	Tokyo
37. Moto-hachioji	10	E	15, 35	0.53333	0.00078	II	Tokyo
38. Yarimizu	10	C (0.10), E (0.90)	10, 13	0.2	0.00264	I, II	Tokyo
39. Soka U	4	F	11, 36	0.5	0.00073	II	Tokyo
40. Takatsuki	10	C	10	0	0	I	Tokyo
41. Shimoyugi	2	C	10	0	0	I	Tokyo
42. TMU	1	E	13	NA	NA	II	Tokyo
43. Itaatezawa	8	C (0.75), E (0.13), F (0.12)	10, 11, 13, 37	0.64286	0.00686	I, II	Tokyo
44. Katakura	5	E	13	0	0	II	Tokyo
45. Takao	2	E	15, 38	1	0.00147	II	Tokyo
46. Kinborizawa	5	C	10	0	0	I	Tokyo
47. Osawagawa	3	C	10	0	0	I	Tokyo
48. Chuo U	1	E	39	NA	NA	II	Tokyo
49. Kamikawa	5	C (0.40), F (0.60)	10, 11, 40, 41	0.9	0.00997	I, II	Tokyo
50. Yano	10	C (0.30), E (060), F (0.10)	10, 11, 13, 42, 43, 44, 45	0.86667	0.00942	I, II	Tokyo
51. Kita-asakawa	6	E (0.33), F (0.67)	11, 34, 46, 47	0.86667	0.00665	II	Tokyo
52. Kawaguchi	22	C (0.27), E (0.41), F (0.32)	10, 11, 13, 48	0.72294	0.00727	I, II	Tokyo
53. Komiya	5	C	10	0	0	I	Tokyo
54. Mogusa	4	C (0.50), E (0.50)	13, 35, 49, 50	1	0.01246	I, II	Tokyo
55. Meisei U-Hino	15	C (0.80), E (0.20)	10, 13, 51, 52, 53	0.62857	0.00528	I, II	Tokyo
56. Shibasaki	4	E	38	0	0	II	Tokyo
57. Nariki	8	C (0.75), E (0.25)	10, 13, 26, 35	0.64286	0.00749	I, II	Tokyo
58. Ishigamizawa	4	C (0.75), E (0.25)	10, 13	0.5	0.0066	I, II	Tokyo
59. Higashi-ome	5	C (0.60), E (0.40)	10, 13, 33, 54	0.9	0.0085	I, II	Tokyo
60. Onitagawa	6	C (0.67), E (0.33)	10, 13, 15, 55	0.86667	0.00997	I, II	Tokyo
61. Meisei U-Ome	23	C (0.22), E (0.78)	10, 13, 14, 15, 53, 56, 57	0.74308	0.00662	I, II	Tokyo
62. Shinmeizawa	5	C (0.40), E (0.60)	10, 13, 25	0.8	0.0085	I, II	Tokyo
63. Negarami	5	C (0.40), E (0.60)	10, 13	0.6	0.00792	I, II	Tokyo
64. Kiyotaki	5	C (0.60), E (0.40)	10, 13, 15	0.7	0.00909	I, II	Tokyo
65. Akishima	1	E	11	NA	NA	II	Tokyo
66. Musashi-murayama	3	E	34, 38	0.66667	0.00391	II	Tokyo
67. Kishi	2	C	10	0	0	I	Tokyo
68. Sayama-kyuryo	4	C	10	0	0	I	Tokyo
69. Kodaira	10	E	22, 58, 59	0.64444	0.00228	II	Tokyo
70. Tamagawa-jyosui	3	C	10	0	0	II	Tokyo
71. Chofu	9	E (0.44), F (0.56)	11, 13	0.55556	0.00244	I	Tokyo
72. Jindai	10	B (0.30), C (0.10), E (0.20), F (0.40)	10, 11, 13, 60, 61	0.82222	0.00635	I, II, –	Tokyo
73. Fuchu	5	E	13	0	0	II	Tokyo
74. Nogawa	15	E (0.87), M (0.06), W (0.07)	13, 34, 38, 62, 63, 64	0.80952	0.0067	I, II	Tokyo
75. ICU	10	E	13, 34, 65	0.37778	0.00117	II	Tokyo
76. Mitsugi	6	C	10, 54	0.33333	0.00049	I	Tokyo
77. Tamako	5	E	34	0	0	II	Tokyo
78. Inagi	6	C	10, 49	0.33333	0.00049	I	Tokyo
79. Machida	3	C	10	0	0	I	Tokyo
80. Takane	14	C	10	0	0	I	Tokyo
81. Tonogaya	5	C	10, 54	0.4	0.00059	I	Tokyo
82. Sunniwa	10	E (0.90), F (0.10)	11, 13, 15, 30, 66	0.82222	0.00355	II	Tokyo
83. Taru	9	C (0.89), T (0.11)	10, 33, 67	0.41667	0.0009	I	Tokyo
84. Unazawa	4	C (0.25), E (0.75)	13, 62, 68, 69	1	0.011	I, II	Tokyo
85. Kaminoto	7	C (0.57), E (0.14), F (0.14), T (0.15)	11, 13, 40, 67, 70	0.85714	0.00838	I, II	Tokyo
86. Chitaru	10	C (0.50), E (0.40), F (0.10)	10, 11, 13, 70	0.77778	0.00841	I, II	Tokyo
87. Suginami	9	C (0.67), E (0.22), J (0.11)	10, 15, 35,	0.55556	0.00863	I, II	Tokyo
88. Mitsuike	2	C	10	0	0	I	Tokyo
89. Shirogane	12	C (0.83), E (0.17)	10, 59, 71	0.31818	0.00429	I, II	Tokyo
90. Yokohama	14	C	10, 72, 73	0.27473	0.00042	I	East Honshu
91. Jike	6	E	13, 22, 66	0.73333	0.00225	II	West Honshu-Shikoku
92. Nanzan	2	C	10	0	0	I	East Honshu
93. Yokosuka	10	C (0.90), E (0.10)	10, 15	0.2	0.00323	I, II	East Honshu
94. Hisamura	3	C	10	0	0	I	East Honshu
95. Miura	3	C	10	0	0	I	East Honshu
96. Zushi	6	C	10	0	0	I	East Honshu
97. Ikuta-ryokuchi	6	C (0.50), E (0.33), K (0.17)	10, 66, 74, 75	0.8	0.01818	I, II, III	East Honshu
98. Yugawara	4	E (0.50), F (0.50)	11, 38, 76	0.83333	0.00342	II	West Honshu-Shikoku
99. Hakone	5	E	15, 22	0.4	0.00176	II	West Honshu-Shikoku
100. Hirase	10	E (0.50), F (0.50)	11, 13, 77	0.64444	0.00274	II	West Honshu-Shikoku
101. Shimobe	8	E (0.50), F (0.34), J (0.16)	10, 11, 13, 78	0.67857	0.00272	II	West Honshu-Shikoku
102. Nagaoka	7	A (0.86), D (0.14)	2, 79, 80,	0.52381	0.00084	I	East Honshu
103. Itoigawa	7	A (0.86), B (0.14)	2, 6	0.28571	0.00209	I	East Honshu
104. Sado	11	A	2	0	0	I	East Honshu
105. Aga	3	A	2	0	0	I	East Honshu
106. Joetsu	3	A (0.67), E (0.33)	2, 14	0.66667	0.01075	I, II	East Honshu
107. Fukui	10	E	15, 38, 81, 82	0.77778	0.0016	II	West Honshu-Shikoku
108. Matsumoto	13	C (0.08), F (0.92)	10, 11, 83	0.29487	0.00248	I, II	West Honshu-Shikoku
109. Chino	5	F	11, 77	0.6	0.00352	II	West Honshu-Shikoku
110. Nozawa	10	B (0.10), F (0.90)	6, 11, 84	0.64444	0.00316	I, II	West Honshu-Shikoku
111. Omachi	8	E (0.13), F (0.87)	11, 13	0.25	0.0011	II	West Honshu-Shikoku
112. Hakuba	9	B	6	0	0	I	East Honshu
113. Yamanouchi	2	F	11	0	0	II	West Honshu-Shikoku
114. Seki	13	E	15, 85	0.28205	0.00041	II	West Honshu-Shikoku
115. Minokamo	8	G (0.25), E (0.75)	15, 85, 86, 87	0.75	0.00335	II	West Honshu-Shikoku
116. Takayama	10	E	15, 88, 89	0.37778	0.00117	II	West Honshu-Shikoku
117. Hirugano	10	E	15, 85, 89	0.6	0.00098	II	West Honshu-Shikoku
118. Numazu	9	E (0.33), F (0.67)	11, 15, 83, 89, 90	0.80556	0.0031	II	West Honshu-Shikoku
119. Kanaya	9	E (0.89), F (0.11)	36, 87, 91, 92	0.69444	0.00187	II	West Honshu-Shikoku
120. Matsuzaki	2	C (0.50), T (0.50)	10, 93	1	0.00587	I	East Honshu
121. Izu	2	C (0.50), T (0.50)	10, 94	1	0.0044	I	East Honshu
122. Toyohashi	14	E (0.64), F (0.21), H (0.07), V (0.08)	11, 87, 95, 96, 97, 98, 99	0.81319	0.00459	II	West Honshu-Shikoku
123. Tsugu	9	E (0.44), F (0.11), H (0.45)	11, 87, 95, 96, 99	0.80556	0.00578	II	West Honshu-Shikoku
124. Owase	9	E	59	0	0	II	West Honshu-Shikoku
125. Yokkaichi	2	E	71	0	0	II	West Honshu-Shikoku
126. Shiga	3	E	59	0	0	II	West Honshu-Shikoku
127. Minoh	3	E	59	0	0	II	West Honshu-Shikoku
128. Nara	4	E (0.50), K (0.50)	29, 100, 101	0.83333	0.01979	II, III	West Honshu-Shikoku
129. Santo	9	E	14, 15, 34, 35, 102, 103	0.94444	0.0031	II	West Honshu-Shikoku
130. Hamasaka	13	E	29, 59, 104, 105	0.71795	0.00214	II	West Honshu-Shikoku
131. Hyogo	2	E	59	0	0	II	West Honshu-Shikoku
132. Kawayu	2	E	106, 107	1	0.0044	II	West Honshu-Shikoku
133. Kofu	3	E	30, 108	0.66667	0.00098	II	West Honshu-Shikoku
134. Hinogawa	3	E (0.67), J (0.33)	30, 109	0.66667	0.00098	II	West Honshu-Shikoku
135. Oki	11	E (0.80), I (0.20)	40, 110, 111, 112, 113	0.61818	0.00128	II	West Honshu-Shikoku
136. Mitoya	9	E	30	0	0	II	West Honshu-Shikoku
137. Okayama	4	E	29, 30	0.5	0.00147	II	West Honshu-Shikoku
138. Tetta	10	E (0.80), J (0.20)	30, 114, 115	0.37778	0.00117	II	West Honshu-Shikoku
139. Age	4	E	29, 30	0.5	0.00147	II	West Honshu-Shikoku
140. Toyota	13	E (0.38), K (0.54), L (008)	30, 63, 116, 117, 118, 119, 120, 121, 122	0.9359	0.01562	II, III	West Honshu-Shikoku
141. Shioe	4	E	22, 123	0.5	0.00073	II	West Honshu-Shikoku
142. Ayakawa	2	E	66	0	0	II	West Honshu-Shikoku
143. Tosayama	9	E	22, 124	0.22222	0.00033	II	West Honshu-Shikoku
144. Taisho	3	E	22	0	0	II	West Honshu-Shikoku
145. Kuroshio	2	E	22	0	0	II	West Honshu-Shikoku
146. Omogo	10	E	22, 125	0.2	0.00029	II	West Honshu-Shikoku
147. Misato	17	E (0.41), U (0.59)	22, 66, 126, 127	0.625	0.00515	II	West Honshu-Shikoku
148. Kokura	5	K	116, 128, 129, 130, 131	1	0.0044	III	Kyushu
149. Hiraodai	6	K	101, 116, 128	0.73333	0.00225	III	Kyushu
150. Ogi	11	K (0.45), M (0.45), N (0.10)	63, 116, 132, 133, 134, 135	0.85455	0.00459	III	Kyushu
151. Tsushima	10	K	136, 137	0.46667	0.00068	III	Kyushu
152. Yamaga	9	K (0.56), O (0.44)	63, 101, 138, 139	0.75	0.00253	III	Kyushu
153. Kyokushi	5	K (0.20), O (0.40), P (0.40)	139, 140, 141, 142	0.9	0.01144	III	Kyushu
154. Hitoyoshi	3	P	23, 143	0.66667	0.00098	III	Kyushu
155. Oita	5	K (0.80), O (0.20)	139, 141, 144	0.7	0.00176	III	Kyushu
156. Kitagawa	10	K (0.40), O (0.40), R (0.10), S (0.10)	63, 139, 141, 145, 146, 147	0.84444	0.00587	III	Kyushu
157. Miyazaki	10	P (0.80), Q (0.10), R (0.10)	23, 148, 149, 150, 151, 152	0.86667	0.00186	III	Kyushu
158. Aya	3	P	23	0	0	III	Kyushu
159. Miyanojyo	9	P	23, 153	0.22222	0.00033	III	Kyushu
160. Gamo	3	P	23	0	0	III	Kyushu
161. Tarumizu	3	P	23	0	0	III	Kyushu
162. Yusui	3	P	23, 154	0.66667	0.00098	III	Kyushu
163. Nishi-nihon	2	E	30	0	0	II	West Honshu-Shikoku
The coexistence of clades I, II, and III in a population is due to translocation or natural dispersal. "–": not included in any of the three clades I , II, and III. NA: not applicable due to a single individual.
