# Supplementary material
Source: Research Square preprint supplement (doi:10.21203/rs.3.rs-9489127/v1)
Supplement: Supplementary file 4 [file ac4b9d3f00abc17962cbc647.xlsx]

## Sheet: S2
Supplementary Table S2. Mitochondrial COII haplotypes and their distribution across populations
Clade	Individual	Haplotype	RFLP haplotype	Population
I	454	Hpa_1-10, 12, 16-20, 24, 26-28, 32-33, 37, 40, 42-43, 49-56, 64, 67-68, 70, 72-73, 79-80, 93-94.	A, B, C, D, T, W	1. Aomori, 2. Hirosaki, 3. Morioka, 4. Kamaishi, 5. Sendai, 6. Yamagata, 7. Yonezawa, 8. Iwaki, 9. Aizu-wakamatsu, 10. Nishi-aizu, 11. Ashikaga, 12. Bato, 13. Tomioka, 14. Gozenyama, 15. Tsukuba, 16. Itako, 17. Ranzan, 18. Hidaka, 19. Higashi-gono, 20. Hongo, 21. Karo, 22. Mitake, 23. Shimohata, 24. Tenran, 25. Waseda U, 26. Fuppari, 27. Kubo, 28. Ohara, 30. Chiba2, 32. Akigawa, 33. Yokosawa, 34.…
II	545	Hpa_11, 13-15, 22, 25, 29-31, 34-36, 38-39, 41, 44-48, 57-60, 62, 65-66, 69, 71, 74, 76-78, 81-92, 95-100, 102-115, 117-118, 121, 123-127.	E, F, G, H, I, J, U, V	11. Ashikaga, 12. Bato, 19. Higashi-gono, 21. Karo, 22. Mitake, 23. Shimohata, 24. Tenran, 29. Kamogawa, 31. Chiba1, 32. Akigawa, 33. Yokosawa, 34. Irino, 35. Fukazawa, 36. Yozawa, 37. Moto-hachioji, 38. Yarimizu, 42. TMU, 43. Itaatezawa, 44. Katakura, 45. Takao, 48. Chuo U, 50. Yano, 51. Kita-asakawa, 52. Kawaguchi, 54. Mogusa, 55. Meisei U-Hino, 56. Shibasaki, 57. Nariki, 58. Ishigamizawa, 59. …
III	100	Hpa_23, 63, 75, 101, 116, 119-120, 122, 128-154.	K, L, M, N, O, P, Q, R, S	19. Higashi-gono, 74. Nogawa, 97. Ikuta-ryokuchi, 128. Nara, 140. Toyota, 148. Kokura, 149. Hiraodai, 150. Ogi, 151. Tsushima, 152. Yamaga, 153. Kyokushi, 154. Hitoyoshi, 155. Oita, 156. Kitagawa, 157. Miyazaki, 158. Aya, 159. Miyanojyo, 160. Gamo, 161. Tarumizu, 162. Yusui.
-	2	Hpa_21, 61.	B	18. Hidaka, 72. Jindai.
List of mitochondrial COII haplotypes detected in Nipponoluciola cruciata and their occurrence across sampled populations. For each haplotype, corresponding in silico RFLP haplotype, phylogeographic lineage assignment (Clade I: East Honshu, Clade II: West Honshu–Shikoku, Clade III: Kyushu), and population numbers are provided. "–": not included in any of the three clades I , II, and III.
