# Supplementary material
Source: Research Square preprint supplement (doi:10.21203/rs.3.rs-9489127/v1)
Supplement: Supplementary file 5 [file b4a9566e308b830ae0d71425.xlsx]

## Sheet: S3
Supplementary Table S3. Population group assignment for genetic differentiation analyses
Population group	Clade	Population
East Honshu	I, (II, III)	1. Aomori, 2. Hirosaki, 3. Morioka, 4. Kamaishi, 5. Sendai, 6. Yamagata, 7. Yonezawa, 8. Iwaki, 9. Aizu-wakamatsu, 10. Nishi-aizu, 11. Ashikaga, 12. Bato, 13. Tomioka, 14. Gozenyama, 15. Tsukuba, 16. Itako, 17. Ranzan, 18. Hidaka, 19. Higashi-gono, 20. Hongo, 21. Karo, 22. Mitake, 23. Shimohata, 24. Tenran, 25. Waseda U, 26. Fuppari, 27. Kubo, 28. Ohara, 30. Chiba2, 90. Yokohama, 92. Nanzan, 93. …
Tokyo	I, II, III	32. Akigawa, 33. Yokosawa, 34. Irino, 35. Fukazawa, 36. Yozawa, 37. Moto-hachioji, 38. Yarimizu, 39. Soka U, 40. Takatsuki, 41. Shimoyugi, 42. TMU, 43. Itaatezawa, 44. Katakura, 45. Takao, 46. Kinborizawa, 47. Osawagawa,, 48. Chuo U, 49. Kamikawa, 50. Yano, 51. Kita-asakawa, 52. Kawaguchi, 53. Komiya, 54. Mogusa, 55. Meisei U-Hino, 56. Shibasaki, 57. Nariki, 58. Ishigamizawa, 59. Higashi-ome, 60.…
West Honshu-Shikoku	II, (I, III)	29. Kamogawa, 31. Chiba1, 91. Jike, 98. Yugawara, 99. Hakone, 100. Hirase, 101. Shimobe, 107. Fukui, 108. Matsumoto, 109. Chino, 110. Nozawa, 111. Omachi, 113. Yamanouchi, 114. Seki, 115. Minokamo, 116. Takayama, 117. Hirugano, 118. Numazu, 119. Kanaya, 122. Toyohashi, 123. Tsugu, 124. Owase, 125. Yokkaichi, 126. Shiga , 127. Minoh, 128. Nara, 129. Santo, 130. Hamasaka, 131. Hyogo, 132. Kawayu, 1…
Kyushu	III	148. Kokura, 149. Hiraodai, 150. Ogi, 151. Tsushima, 152. Yamaga, 153. Kyokushi, 154. Hitoyoshi, 155. Oita, 156. Kitagawa, 157. Miyazaki, 158. Aya, 159. Miyanojyo, 160. Gamo, 161. Tarumizu, 162. Yusui
Assignment of sampled populations to four population groups used in genetic differentiation and gene-flow analyses: East Honshu, West Honshu–Shikoku, Kyushu, and Tokyo metropolitan area. Population grouping followed phylogeographic lineage structure inferred from mitochondrial analyses and geographic location (Clade I: East Honshu, Clade II: West Honshu–Shikoku, Clade III: Kyushu). The coexistenc…
